# Supplementary material for: Measurement of the absorption cross-sections of sulfur compounds in the 180–270 nm region considering nonlinear effects
Source: Royal Society of Chemistry journal article supplement (doi:10.1039/d3cp05881f), 2024-01-01
Supplement: d3cp05881f1.pdf [file d3cp05881f1.pdf]

## Supplementary material

### Measurement of the absorption cross-sections of sulfur compounds in the 180-270 nm region considering nonlinear effects

Jie Gao<sup>a</sup>, Yongqi Wu<sup>a</sup>, Shuo Zhao<sup>a</sup>, Rui Zhu<sup>a</sup>, Mu Li<sup>a</sup>, Wanyi Qin<sup>a</sup>, Yucun Zhang<sup>a</sup>,  
and Yungang Zhang<sup>a\*</sup>

<sup>a</sup>*School of Electrical Engineering, Yanshan University, Qinhuangdao 066004, China*

\*Corresponding author: E-mail: zhangyg@ysu.edu.cn, tel: +86-0335-8387567

## Table of contents

|                                                                                      |   |
|--------------------------------------------------------------------------------------|---|
| Part 1: Theoretical explanation of the nonlinear effect .....                        | 2 |
| Part 2: Sample collection process.....                                               | 3 |
| Part 3: Comparative analysis of SO <sub>2</sub> absorption cross-section .....       | 3 |
| Part 4: Comparative analysis of CS <sub>2</sub> absorption cross-section.....        | 5 |
| Part 5: Comparative analysis of H <sub>2</sub> S and OCS absorption cross-section... | 6 |
| References .....                                                                     | 8 |

## Part 1: Theoretical explanation of the nonlinear effect

The conditions for the application of Lambert-Beer law, whether measuring the concentration of solutions or gases, are that the incident light is parallel monochromatic and perpendicularly illuminated. However, the detector actually receives multicolored light during the measurement. Based on the principle of additivity of multicolor light intensities, we give a theoretical explanation for the linear deviation of the Lambert-Beer law with respect to resolution and concentration, as shown in Eq. S1. The exact derivation of Eq. S1 is described in the literature [1].

$$A_s = \sum_{n=1}^N A_n = 0.4343k_\alpha CL \sum_{n=1}^N \sigma(\lambda_{1n}) + \sum_{n=1}^N \lg \frac{I_{0n}(\lambda_{1n}) + I_{0n}(\lambda_{2n})}{I_{0n}(\lambda_{1n}) + I_{0n}(\lambda_{2n}) \times \exp[(\sigma(\lambda_{1n}) - \sigma(\lambda_{2n}))k_\alpha CL]} \quad (\text{S1})$$

$A_s$  is the sum of absorbance;  $\lambda_{1n}$ ,  $\lambda_{2n}$  are two different wavelengths received by the  $n$ th detector, respectively;  $\sigma(\lambda)$  is the absorption cross-section at  $\lambda$ ;  $C$  is the concentration of the substance; and  $L$  is the effective optical range.

Let:

$$\begin{cases} A_l = 0.4343k_\alpha CL \sum_{n=1}^N \sigma(\lambda_{1n}) \\ A_d = \sum_{n=1}^N \lg \frac{I_{0n}(\lambda_{1n}) + I_{0n}(\lambda_{2n})}{I_{0n}(\lambda_{1n}) + I_{0n}(\lambda_{2n}) \times \exp[(\sigma(\lambda_{1n}) - \sigma(\lambda_{2n}))k_\alpha CL]} \end{cases} \quad (\text{S2})$$

$A_l$  is the linear part of Lambert-Beer law;  $A_d$  is the source of the deviation from linearity. Absorbance ( $A_s$ ) and total column concentration ( $CL$ ) show a linear relationship only when the light received by the detector has the same absorption cross-section ( $A_d = 0$ ). From  $A_d$ , it can be found that the linear deviation is negatively correlated with the resolution (value) and positively correlated with the column concentration. The nonlinear effect is the result of insufficient spectral resolution. Therefore, a direct means of reducing the deviation from linearity is to increase the resolution. However, the resolution of the spectrometer cannot be increased indefinitely

making  $\sigma(\lambda_{1n}) = \sigma(\lambda_{2n})$ . Therefore, the column concentration ( $CL$ ) should be made as small as possible in order to keep the error within allowable limits ( $A_d$  can be ignored.) at a fixed resolution. At this point, the absorbance was considered to be linearly related to the column concentration.

## **Part 2: Sample collection process**

The ex-factory quality of the four standard gases  $SO_2$ ,  $CS_2$ ,  $H_2S$  and  $OCS$  used by us were 1497 ppm, 101 ppm, 96 ppm and 205 ppm respectively. The standard gases and their high purity nitrogen (99.99%) used throughout the experiments were supplied by Nanjing Tianze Gas Co., Ltd. The standard gases produced by this company are in accordance with the standard QBW:TZ0190. The relative extended uncertainty of the concentration of the standard gas is 2% (clearly marked on the production certificate of the standard substance).

A gas distributor (GC400, Tunkon) supplied by Tunkon Electric Co., Ltd. is used, which consists of one dilution channel and four sample channels. Each channel inside the gas distributor is actually adjusted by an independent MFC mass flow controller to adjust the process flow, and after uniform mixing is able to output a complex mixture of gases with different concentrations of each component. In this experiment, high purity nitrogen is passed into the dilution channel and standard gas can be passed into any of the sample channels to mix with the dilution gas. Finally, the mixed gas is passed into the sample cell at a flow rate of 1L/min. The maximum achievable dilution ratio of the instrument is 500:1, and the accuracy of the gas distribution is  $\pm 0.5\%$  F.S.

## **Part 3: Comparative analysis of $SO_2$ absorption cross-section**

Numerous research groups in previous studies have carried out measurements of  $SO_2$  absorption cross-section at different resolutions and temperatures. We compared the results of their data measured at different resolutions under room temperature conditions, as shown in Fig. S1. Theoretically, the higher the resolution the larger the

absorption cross-section obtained. However, we found in Fig. S1(a) that the data obtained by Olive [2] at 0.13 nm is much smaller than that obtained by Ahmedkumar [3] at 0.2 nm. The absorption cross-section obtained by Wu [4] at a high resolution (0.05 nm) is also much smaller than the data obtained in Fig. S1(b) at 0.1 nm. In addition, the obtained data at 0.1 nm resolution are different, as shown in Fig. S1(b). This shows that most researchers used high concentrations for the calculation of absorption cross-sections in order to improve the signal-to-noise ratio of the spectra, ignoring the serious impact of high concentrations on the nonlinear effects. Thus, the absorption cross-section obtained at high resolution is smaller than the data obtained at low resolution in Fig. S1. The specific experimental conditions under which the relevant studies in the figure were performed are shown in Table S1.

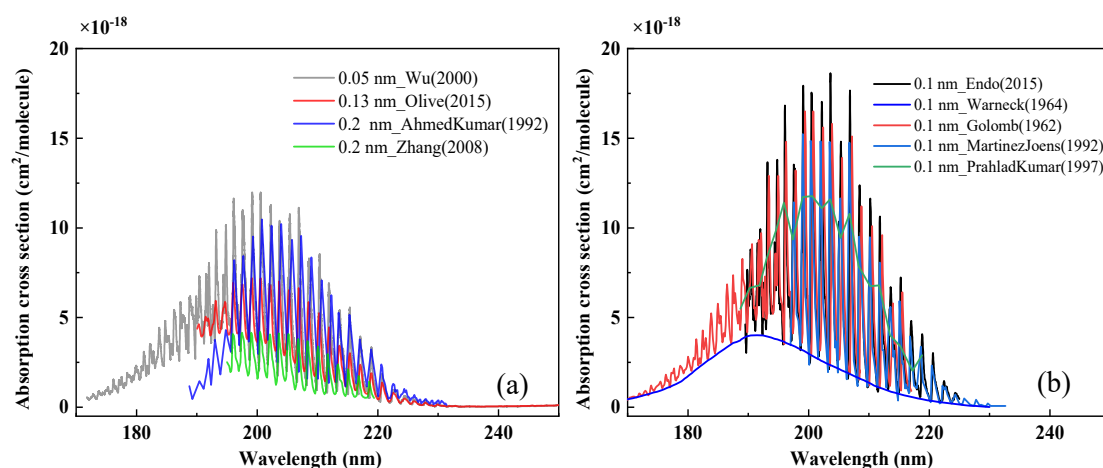

Fig. S1 UV absorption cross-section of SO<sub>2</sub>

Table S1. Summary of SO<sub>2</sub> absorption cross-section

| Researchers<br>(Year)         | Measured<br>region<br>(nm) | Resolution | Experimental conditions |              | Maximum values<br>(cm <sup>2</sup> /molecule) |
|-------------------------------|----------------------------|------------|-------------------------|--------------|-----------------------------------------------|
|                               |                            |            | Temperature             | Pressure     |                                               |
| C. Y. Robert<br>Wu (1981) [5] | 208-228<br>299-340         | 0.06 nm    | 294 K                   | 0.01-40 Torr | 8.0×10 <sup>-18</sup><br>(208.5 nm)           |
| Olive (2015)<br>[2]           | 190-306                    | 0.13 nm    | 298 K                   | --           | 7.20×10 <sup>-18</sup><br>(203.64 nm)         |
| Zhang (2008)<br>[6]           | 195-219.4                  | 0.2 nm     | 298 K                   | 101.3 kPa    | 4.12×10 <sup>-18</sup><br>(203.58 nm)         |
| Warneck<br>(1964) [7]         | 135-230                    | 0.1 nm     | 298 K                   | --           | 4.02×10 <sup>-18</sup><br>(190.4 nm)          |

|                               |                      |                          |       |                   |                                        |
|-------------------------------|----------------------|--------------------------|-------|-------------------|----------------------------------------|
| Golomb (1962)<br>[8]          | 106-217              | 0.1 nm                   | 298 K | --                | $15.6 \times 10^{-18}$<br>(202.41 nm)  |
| PrahladKumar<br>(1997) [9]    | 188-219              | 0.1 nm                   | 300 K | --                | $11.77 \times 10^{-18}$<br>(200.6 nm)  |
| S. M. AHMED<br>(1992) [3]     | 188-231<br>278.7-320 | 0.2 nm                   | 298 K | 0.1-0.35 Torr     | $10.47 \times 10^{-18}$<br>(200.8 nm)  |
| Martinez<br>(1992) [10]       | 197-240              | 0.1 nm                   | 300 K | 100 Torr          | $15.80 \times 10^{-18}$<br>(203.56 nm) |
| Yoshiaki Endo<br>(2015) [11]  | 189.5-225            | 0.1 nm                   | 293 K | 0.1-2.3 Torr      | $18.6 \times 10^{-18}$<br>(203.62 nm)  |
| Stark (1999)<br>[12]          | 198-220              | 0.00054<br>nm            | 295 K | 0.07-0.12<br>Torr | $4.0 \times 10^{-17}$                  |
| Yoshiaki Endo<br>(2022) [13]  | 206-220              | $\sim 1 \text{ cm}^{-1}$ | 295 K | --                | $2.0 \times 10^{-17}$<br>(207 nm)      |
| C. Y. Robert<br>Wu (2000) [4] | 171.7-<br>189.7      | 0.05 nm                  | 295 K | 1 Torr            | $11.98 \times 10^{-18}$<br>(199.2 nm)  |

#### Part 4: Comparative analysis of CS<sub>2</sub> absorption cross-section

Similarly, previous studies regarding CS<sub>2</sub> were organized, as shown in Fig. S2. In the figure, it can be seen that CS<sub>2</sub> and SO<sub>2</sub> appear to be in the same situation. To put it differently, there is a large difference in the absorption cross-sections obtained even at the same resolution. Their specific experimental conditions are shown in Table S2. When comparing the data in Table S2, we found that both Ahmedkumar [14] and Xu [15] performed their experiments at ultra-low pressures. However, Zhang et al. [16] performed their experiments at standard atmospheric pressure. Due to the large difference in pressure in the three experimental environments, the experimental results can be different. However, in the main body of the article, we compared the absorption cross-section obtained using a spectrometer at 0.23 nm with that obtained at 0.1 nm [16] (both at standard atmospheric pressure) and found the same conclusions as those obtained above after analyzing SO<sub>2</sub> in Part 2.

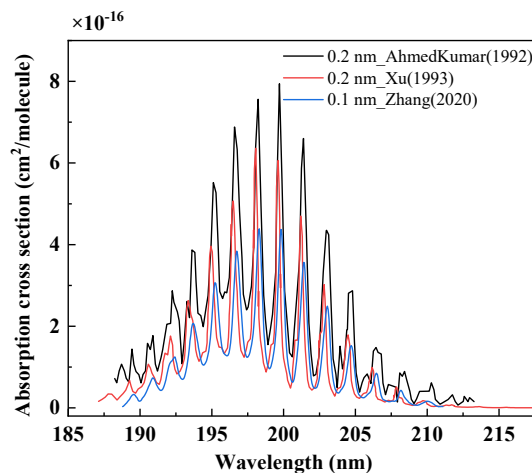

Fig. S2 UV absorption cross-section of CS<sub>2</sub>.

Table S2. Summary of CS<sub>2</sub> absorption cross-section

| Researchers<br>(Years)      | Measured<br>region (nm) | Resolution | Experimental conditions |                    | Maximum values<br>(cm <sup>2</sup> /molecule) |
|-----------------------------|-------------------------|------------|-------------------------|--------------------|-----------------------------------------------|
|                             |                         |            | Temperatur<br>e         | Pressure           |                                               |
| S M<br>AHMED<br>(1992) [14] | 188-213                 | 0.2 nm     | 298 K                   | 1-5 mTorr          | 7.94×10 <sup>-16</sup><br>(198.0 nm)          |
| Huan Xu<br>(1993) [15]      | 187-230                 | 0.2 nm     | 300 K                   | 10-100 Torr        | 6.3×10 <sup>-16</sup><br>(198.0 nm)           |
| Y.G. Zhang<br>(2020) [16]   | 188-215                 | 0.1 nm     | 298 K                   | 101.3-101.5<br>kPa | 4.5×10 <sup>-16</sup><br>(198.1 nm)           |

## Part 5: Comparative analysis of H<sub>2</sub>S and OCS absorption cross-section

The results of the database studies related to H<sub>2</sub>S and OCS are shown in Fig. S3. The specific conditions under which the experiment was conducted are shown in Tables S3 and S4. As can be seen from the figure and tables, the results of the measurements are essentially the same even when the absorption cross-sections are measured at different resolutions. This indicates that the absorption characteristics of H<sub>2</sub>S and OCS are different from the oscillatory type of spectra such as SO<sub>2</sub> and CS<sub>2</sub>, and that a lower spectrometer resolution is sufficient to meet the requirements of a broad band absorption spectrum. Therefore, the concentration does not have a large effect on the measurements of the absorption cross-section.

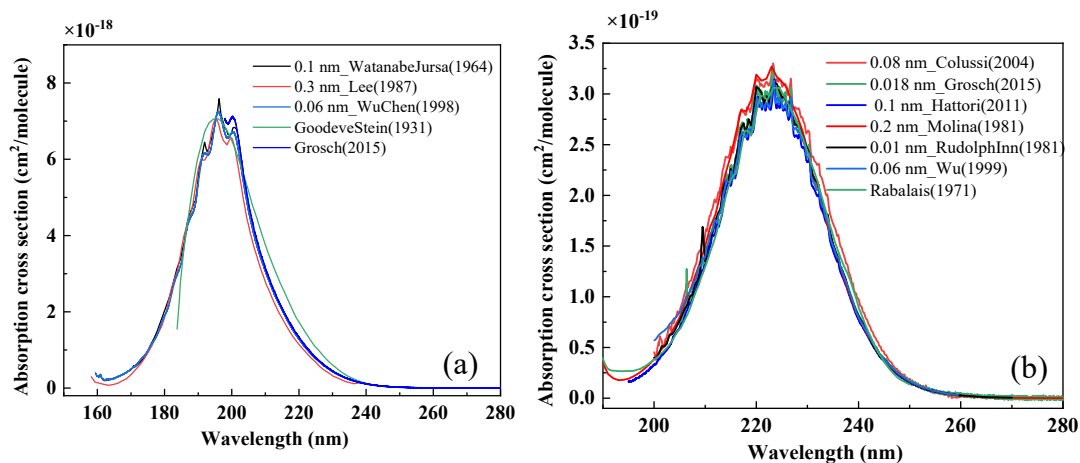

Fig. S3 (a) UV absorption cross-section of H<sub>2</sub>S; (b) UV absorption cross-section of OCS

Table S3. Summary of H<sub>2</sub>S absorption cross-section

| Researchers<br>(Years)      | Measured<br>region (nm) | Resolution | Experimental conditions |               | Maximum values<br>(cm <sup>2</sup> /molecule) |
|-----------------------------|-------------------------|------------|-------------------------|---------------|-----------------------------------------------|
|                             |                         |            | Temperature             | Pressure      |                                               |
| GoodeveStein<br>(1931) [17] | 183.7-270.6             | --         | 298 K                   | --            | 7.09×10 <sup>-18</sup><br>(195.37 nm)         |
| K. Watanabe<br>(1964) [18]  | 160.2-209.4             | 0.1 nm     | 298 K                   | --            | 7.59×10 <sup>-18</sup><br>(196.24 nm)         |
| Lee (1987)<br>[19]          | 158-238                 | 0.3 nm     | 295 K                   | --            | 7.10×10 <sup>-18</sup><br>(195.28 nm)         |
| Grosch<br>(2015) [20]       | 198-370                 | 0.018 nm   | 294.8 K                 | --            | 7.13×10 <sup>-18</sup><br>(200.27 nm)         |
| WuChen<br>(1998) [21]       | 160-260                 | 0.06 nm    | 295 K                   | 0.02-100 Torr | 7.26×10 <sup>-18</sup><br>(195.88 nm)         |

Table S4. Summary of OCS absorption cross-section

| Researchers<br>(Years)            | Measured<br>region<br>(nm) | Resolution | Experimental conditions |               | Maximum values<br>(cm <sup>2</sup> /molecule) |
|-----------------------------------|----------------------------|------------|-------------------------|---------------|-----------------------------------------------|
|                                   |                            |            | Temperature             | Pressure      |                                               |
| L.T. Molina<br>(1981) [22]        | 185-300                    | 0.2 nm     | 295 K                   | 300 Torr      | 3.19×10 <sup>-19</sup><br>(223.5 nm)          |
| C. Y.<br>ROBERT WU<br>(1999) [23] | 200-260                    | 0.06 nm    | 295 K                   | 0.02-100 Torr | 3.0×10 <sup>-19</sup><br>(222.0 nm)           |
| H. Grosch<br>(2015) [24]          | 200-360                    | 0.018 nm   | 295 K                   | 101.3 kPa     | 3.25×10 <sup>-19</sup><br>(223.0 nm)          |

|                           |         |         |       |                |                                       |
|---------------------------|---------|---------|-------|----------------|---------------------------------------|
| Colussi (2004)<br>[25]    | 200-260 | 0.08 nm | 298 K | 2-10 mbar      | $3.3 \times 10^{-19}$<br>(223.3 nm)   |
| Hattori (2011)<br>[26]    | 195-260 | 0.1 nm  | 295 K | 133 mbar       | $3.14 \times 10^{-19}$<br>(223.52 nm) |
| RudolphInn<br>(1981) [27] | 200-270 | 0.01 nm | 297 K | 2.5-90 Torr    | $3.11 \times 10^{-19}$<br>(223.5 nm)  |
| Rabalais<br>(1971) [28]   | 125-250 | --      | 298 K | $10^{-4}$ Torr | $3.06 \times 10^{-19}$<br>(223.26 nm) |

## References

- [1] L. Li, H. Zhao, N. Ni, Y. Wang, J. Gao, Q. Gao, Y. Zhang, Y. Zhang, Study on the origin of linear deviation with the Beer-Lambert law in absorption spectroscopy by measuring sulfur dioxide, *Spectrochim. Acta, Part A*, 275 (2022) 121192, <https://doi.org/10.1016/j.saa.2022.121192>.
- [2] B. Olive, Result from measurements at the department of chemistry and industrial hygiene, University of North Alabama, Florence, al, (2005).
- [3] S. Ahmed, V. Kumar, Quantitative photoabsorption and fluorescence spectroscopy of SO<sub>2</sub> at 188–231 and 278.7–320 nm, *J. Quant. Spectrosc. Radiat. Transfer*, 47 (1992) 359-373, [https://doi.org/10.1016/0022-4073\(92\)90038-6](https://doi.org/10.1016/0022-4073(92)90038-6).
- [4] C.R. Wu, B. Yang, F. Chen, D. Judge, J. Caldwell, L. Trafton, Measurements of high-, room-, and low-temperature photoabsorption cross sections of SO<sub>2</sub> in the 2080-to 2950-Å region, with application to Io, *Icarus*, 145 (2000) 289-296, <https://doi.org/10.1006/icar.1999.6322>.
- [5] C. Robert Wu, D.L. Judge, SO<sub>2</sub> and CS<sub>2</sub> cross section data in the ultraviolet region, *Geophys. Res. Lett.*, 8 (1981) 769--771, <https://doi.org/10.1029/GL008i007p00769>.
- [6] S. Zhang, J. Zhou, X. Chen, Experimental study on the temperature dependence of ultraviolet absorption cross-sections of sulfur dioxide, *Front. Energy Power Eng. China*, 2 (2008) 183-186, <https://doi.org/10.1007/s11708-008-0025-2>.
- [7] P. Warneck, F. Marmo, J. Sullivan, Ultraviolet absorption of SO<sub>2</sub>: Dissociation energies of SO<sub>2</sub> and SO, *J. Chem. Phys.*, 40 (1964) 1132-1136, <https://doi.org/10.1063/1.1725260>.
- [8] D. Golomb, K. Watanabe, F. Marmo, Absorption coefficients of sulfur dioxide in the vacuum ultraviolet, *J. Chem. Phys.*, 36 (1962) 958-960, <https://doi.org/10.1063/1.1732695>.



- [9] V. Prahlad, V. Kumar, Temperature dependence of photoabsorption cross-sections of sulfur dioxide at 188–220 nm, *J. Quant. Spectrosc. Radiat. Transfer*, 57 (1997) 719-723, [https://doi.org/10.1016/S0022-4073\(97\)00008-3](https://doi.org/10.1016/S0022-4073(97)00008-3).
- [10] R.D. Martinez, J.A. Joens, SO<sub>2</sub> absorption cross - section measurements from 197 nm to 240 nm, *Geophys. Res. Lett.*, 19 (1992) 277-279, <https://doi.org/10.1029/91GL03165>.
- [11] Y. Endo, S.O. Danielache, Y. Ueno, S. Hattori, M.S. Johnson, N. Yoshida, H.G. Kjaergaard, Photoabsorption cross - section measurements of <sup>32</sup>S, <sup>33</sup>S, <sup>34</sup>S, and <sup>36</sup>S sulfur dioxide from 190 to 220 nm, *J. Geophys. Res.: Atmos.*, 120 (2015) 2546-2557, <https://doi.org/10.1002/2014JD021671>.
- [12] G. Stark, P.L. Smith, J. Rufus, A.P. Thorne, J.C. Pickering, G. Cox, High - resolution photoabsorption cross - section measurements of SO<sub>2</sub> at 295 K between 198 and 220 nm, *J. Geophys. Res.: Planets*, 104 (1999) 16585-16590, <https://doi.org/10.1029/1999JE001022>.
- [13] Y. Endo, S. O. Danielache, M. Ogawa, Y. Ueno, Absorption spectra measurements at ~1 cm<sup>-1</sup> spectral resolution of <sup>32</sup>S, <sup>33</sup>S, <sup>34</sup>S, and <sup>36</sup>S sulfur dioxide for the 206–220 nm region and applications to modeling of the isotopic self-shielding, *Geochemical Journal*, 56 (2022) 40-56, <https://doi.org/10.2343/geochemj.GJ22004>.
- [14] Y. Endo, S.O. Danielache, Y. Ueno, S. Hattori, M.S. Johnson, N. Yoshida, H.G. Kjaergaard, Photoabsorption cross - section measurements of <sup>32</sup>S, <sup>33</sup>S, <sup>34</sup>S, and <sup>36</sup>S sulfur dioxide from 190 to 220 nm, *Journal of Geophysical Research: Atmospheres*, 120 (2015) 2546-2557, <https://doi.org/10.1002/2014jd021671>.
- [15] S. Ahmed, V. Kumar, Measurement of photoabsorption and fluorescence cross-sections for CS<sub>2</sub> at 188.2–213 and 287.5–339.5 nm, *Pramana*, 39 (1992) 367-380, <https://doi.org/10.1007/BF02845821>.
- [16] H. Xu, J.A. Joens, CS<sub>2</sub> absorption cross - section measurements from 187 nm to 230 nm, *Geophys. Res. Lett.*, 20 (1993) 1035-1037, <https://doi.org/10.1029/93GL00809>.
- [17] Y. Zhang, Y. Wang, Y. Liu, X. Ai, Z. Zhang, J. Li, Measurement of CS<sub>2</sub> Absorption Cross-Sections in the 188-215 nm Region at Room Temperature and Atmospheric Pressure, *Appl. Spectrosc.*, 75 (2021) 15-21, <https://doi.org/10.1177/0003702820955244>.
- [18] C. Goodeve, N. Stein, The absorption spectra and the optical dissociation of the hydrides of the oxygen group, *Trans. Faraday Soc.*, 27 (1931) 393-402, <https://doi.org/10.1039/TF9312700393>.
- [19] K. Watanabe, A. Jursa, Absorption and photoionization cross sections of H<sub>2</sub>O and H<sub>2</sub>S, *J. Chem. Phys.*, 41 (1964) 1650-1653, <https://doi.org/10.1063/1.1726138>.

- [20] L. Lee, X. Wang, M. Suto, Quantitative photoabsorption and fluorescence spectroscopy of H<sub>2</sub>S and D<sub>2</sub>S at 49–240 nm, *J. Chem. Phys.*, 86 (1987) 4353-4361, <https://doi.org/10.1063/1.451897>.
- [21] H. Grosch, A. Fateev, S. Clausen, UV absorption cross-sections of selected sulfur-containing compounds at temperatures up to 500 °C, *J. Quant. Spectrosc. Radiat. Transfer*, 154 (2015) 28-34, <https://doi.org/10.1016/j.jqsrt.2014.11.020>.
- [22] C.R. Wu, F. Chen, Temperature-dependent photoabsorption cross sections of H<sub>2</sub>S in the 1600–2600 Å region, *J. Quant. Spectrosc. Radiat. Transfer*, 60 (1998) 17-23, [https://doi.org/10.1016/S0022-4073\(97\)00163-5](https://doi.org/10.1016/S0022-4073(97)00163-5).
- [23] L. Molina, J. Lamb, M. Molina, Temperature dependent UV absorption cross sections for carbonyl sulfide, *Geophys. Res. Lett.*, 8 (1981) 1008-1011, <https://doi.org/10.1029/GL008i009p01008>.
- [24] C.R. Wu, F. Chen, D. Judge, Temperature-Dependent Photoabsorption Cross Sections of OCS in the 2000–2600 Å Region, *J. Quant. Spectrosc. Radiat. Transfer* 61 (1999) 265-271, [https://doi.org/10.1016/S0022-4073\(97\)00220-3](https://doi.org/10.1016/S0022-4073(97)00220-3).
- [25] H. Grosch, A. Fateev, S. Clausen, UV absorption cross-sections of selected sulfur-containing compounds at temperatures up to 500 °C, *J. Quant. Spectrosc. Radiat. Transfer*, 154 (2015) 28-34, <https://doi.org/10.1016/j.jqsrt.2014.11.020>.
- [26] A.J. Colussi, F.-Y. Leung, M.R. Hoffmann, Electronic spectra of carbonyl sulfide sulfur isotopologues, *Environ. Chem.*, 1 (2004) 44-48, <https://doi.org/10.1071/EN04010>.
- [27] S. Hattori, S. Danielache, M. Johnson, J. Schmidt, H. Kjaergaard, S. Toyoda, Y. Ueno, N. Yoshida, Ultraviolet absorption cross sections of carbonyl sulfide isotopologues OC<sup>32</sup>S, OC<sup>33</sup>S, OC<sup>34</sup>S and O<sup>13</sup>CS: isotopic fractionation in photolysis and atmospheric implications, *Atmos. Chem. Phys.*, 11 (2011) 10293-10303, <https://doi.org/10.5194/acp-11-10293-2011>.
- [28] R.N. Rudolph, E.C. Inn, OCS photolysis and absorption in the 200 - to 300 - nm region, *J. Geophys. Res.: Oceans*, 86 (1981) 9891-9894, <https://doi.org/10.1029/JC086iC10p09891>.
- [29] S.P. McGlynn, J.W. Rabalais, J.R. McDonald, V. Scherr, Electronic spectroscopy of isoelectronic molecules. II. Linear triatomic groupings containing sixteen valence electrons, *Chem. Rev.*, 71 (1971) 73-108, <https://doi.org/10.1021/cr60269a004>.
